# Supplementary material for: Modelling and analysis of the complement system signalling pathways: roles of C3, C5a and pro-inflammatory cytokines in SARS-CoV-2 infection
Source: PeerJ journal article supplement (doi:10.7717/peerj.15794), 2023-09-20

Example-1

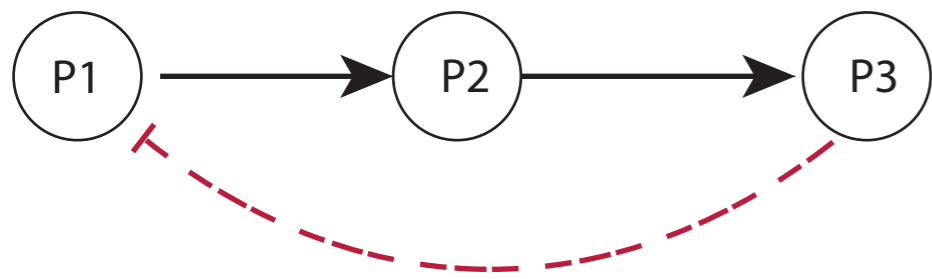

Reduction

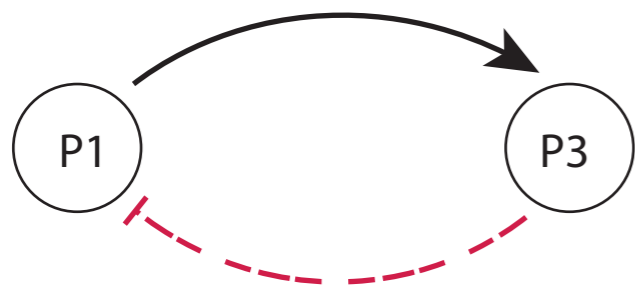

Example-2

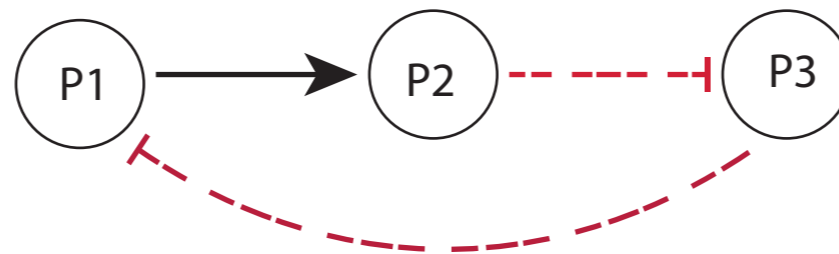

Reduction

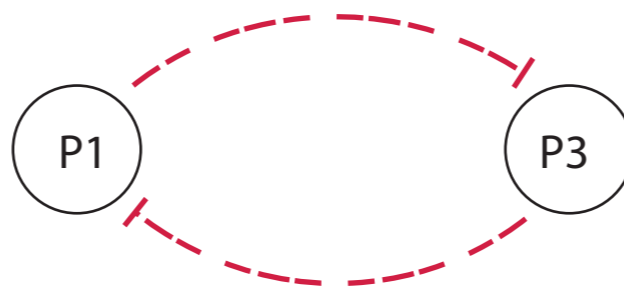

Example-3

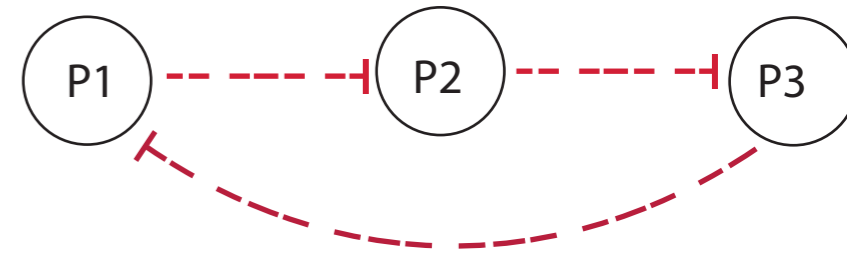

Reduction

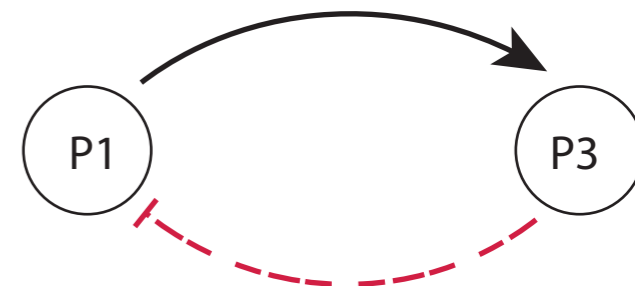

Example-4

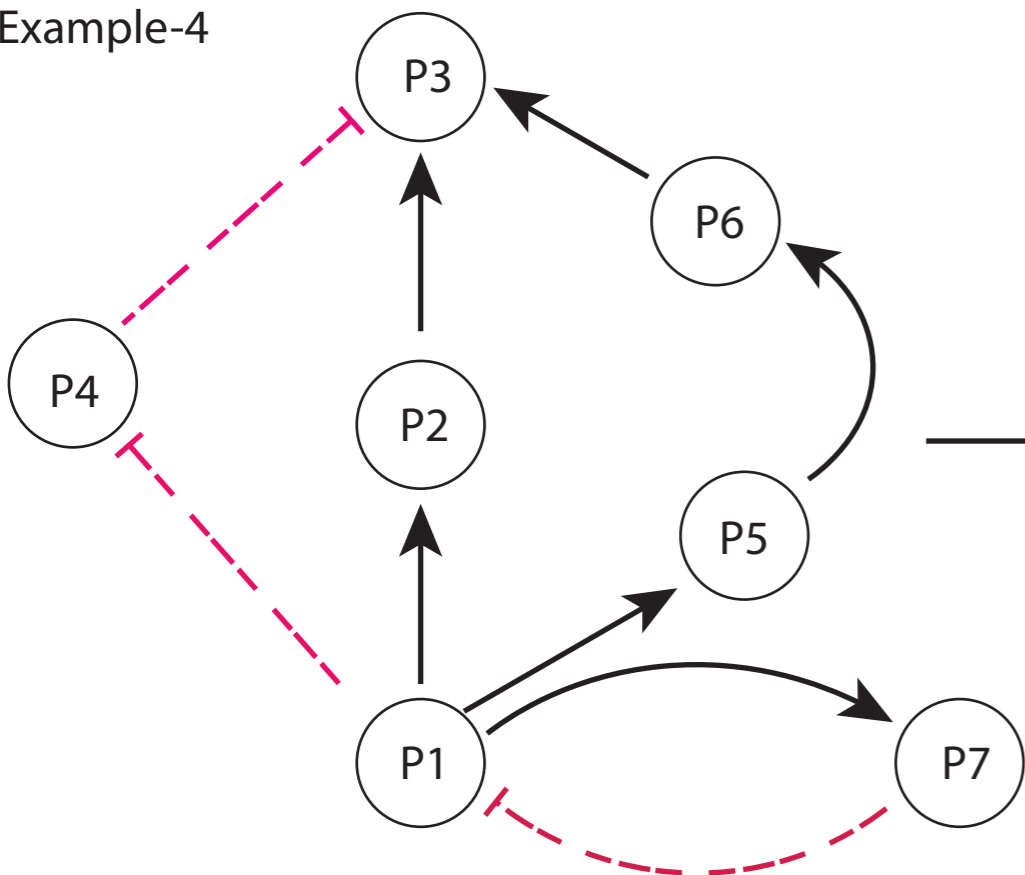

Reduction

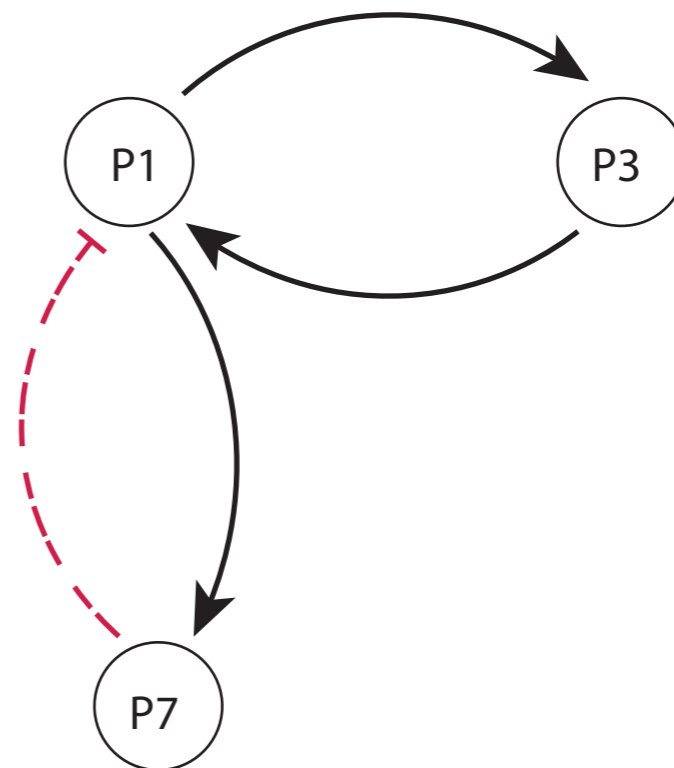

Supplement: FigS1.pdf [file FigS1.pdf]
