# Supplementary material for: Modelling and analysis of the complement system signalling pathways: roles of C3, C5a and pro-inflammatory cytokines in SARS-CoV-2 infection
Source: PeerJ journal article supplement (doi:10.7717/peerj.15794), 2023-09-20
Supplement: FigS4.pdf [file FigS4.pdf]

Starting state

100000

CoV2 C3 C5a PICyts MAC FI-CR1-DAF

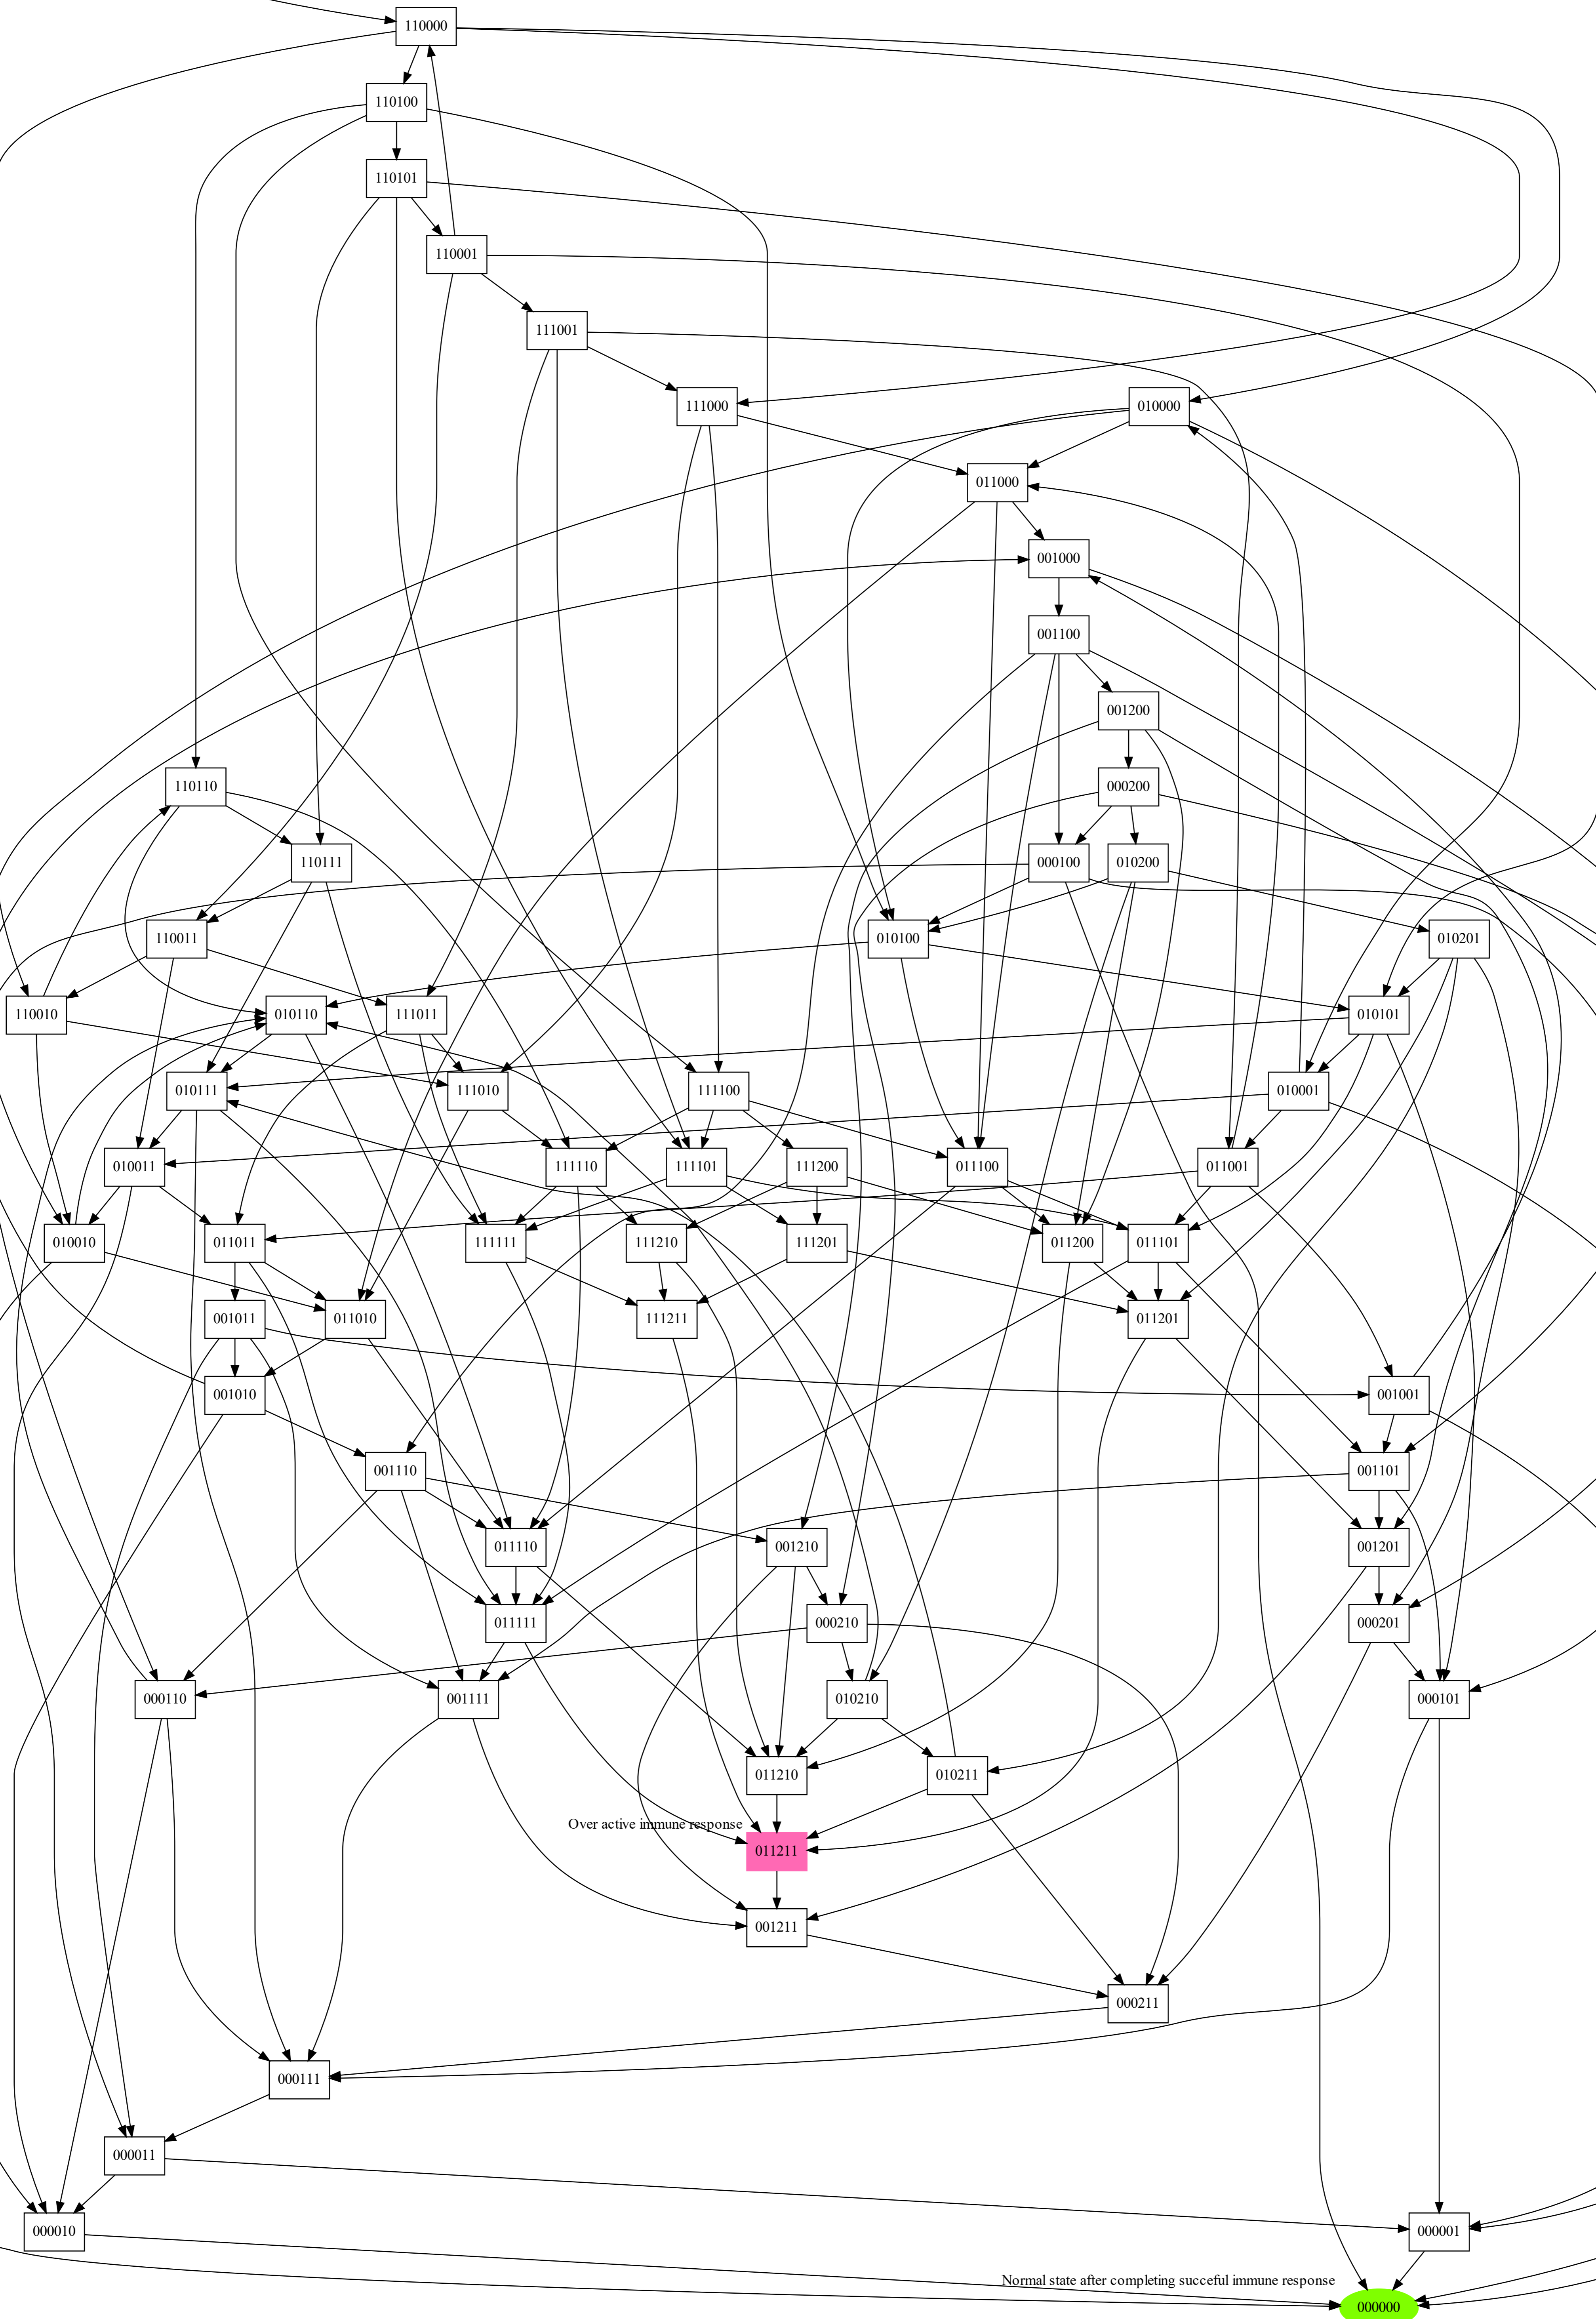

Figure. For normal condition stategraph generated by using parameters set as tabulated in Table 2.
