# Supplementary material for: Modelling and analysis of the complement system signalling pathways: roles of C3, C5a and pro-inflammatory cytokines in SARS-CoV-2 infection
Source: PeerJ journal article supplement (doi:10.7717/peerj.15794), 2023-09-20
Supplement: FigS7.pdf [file FigS7.pdf]

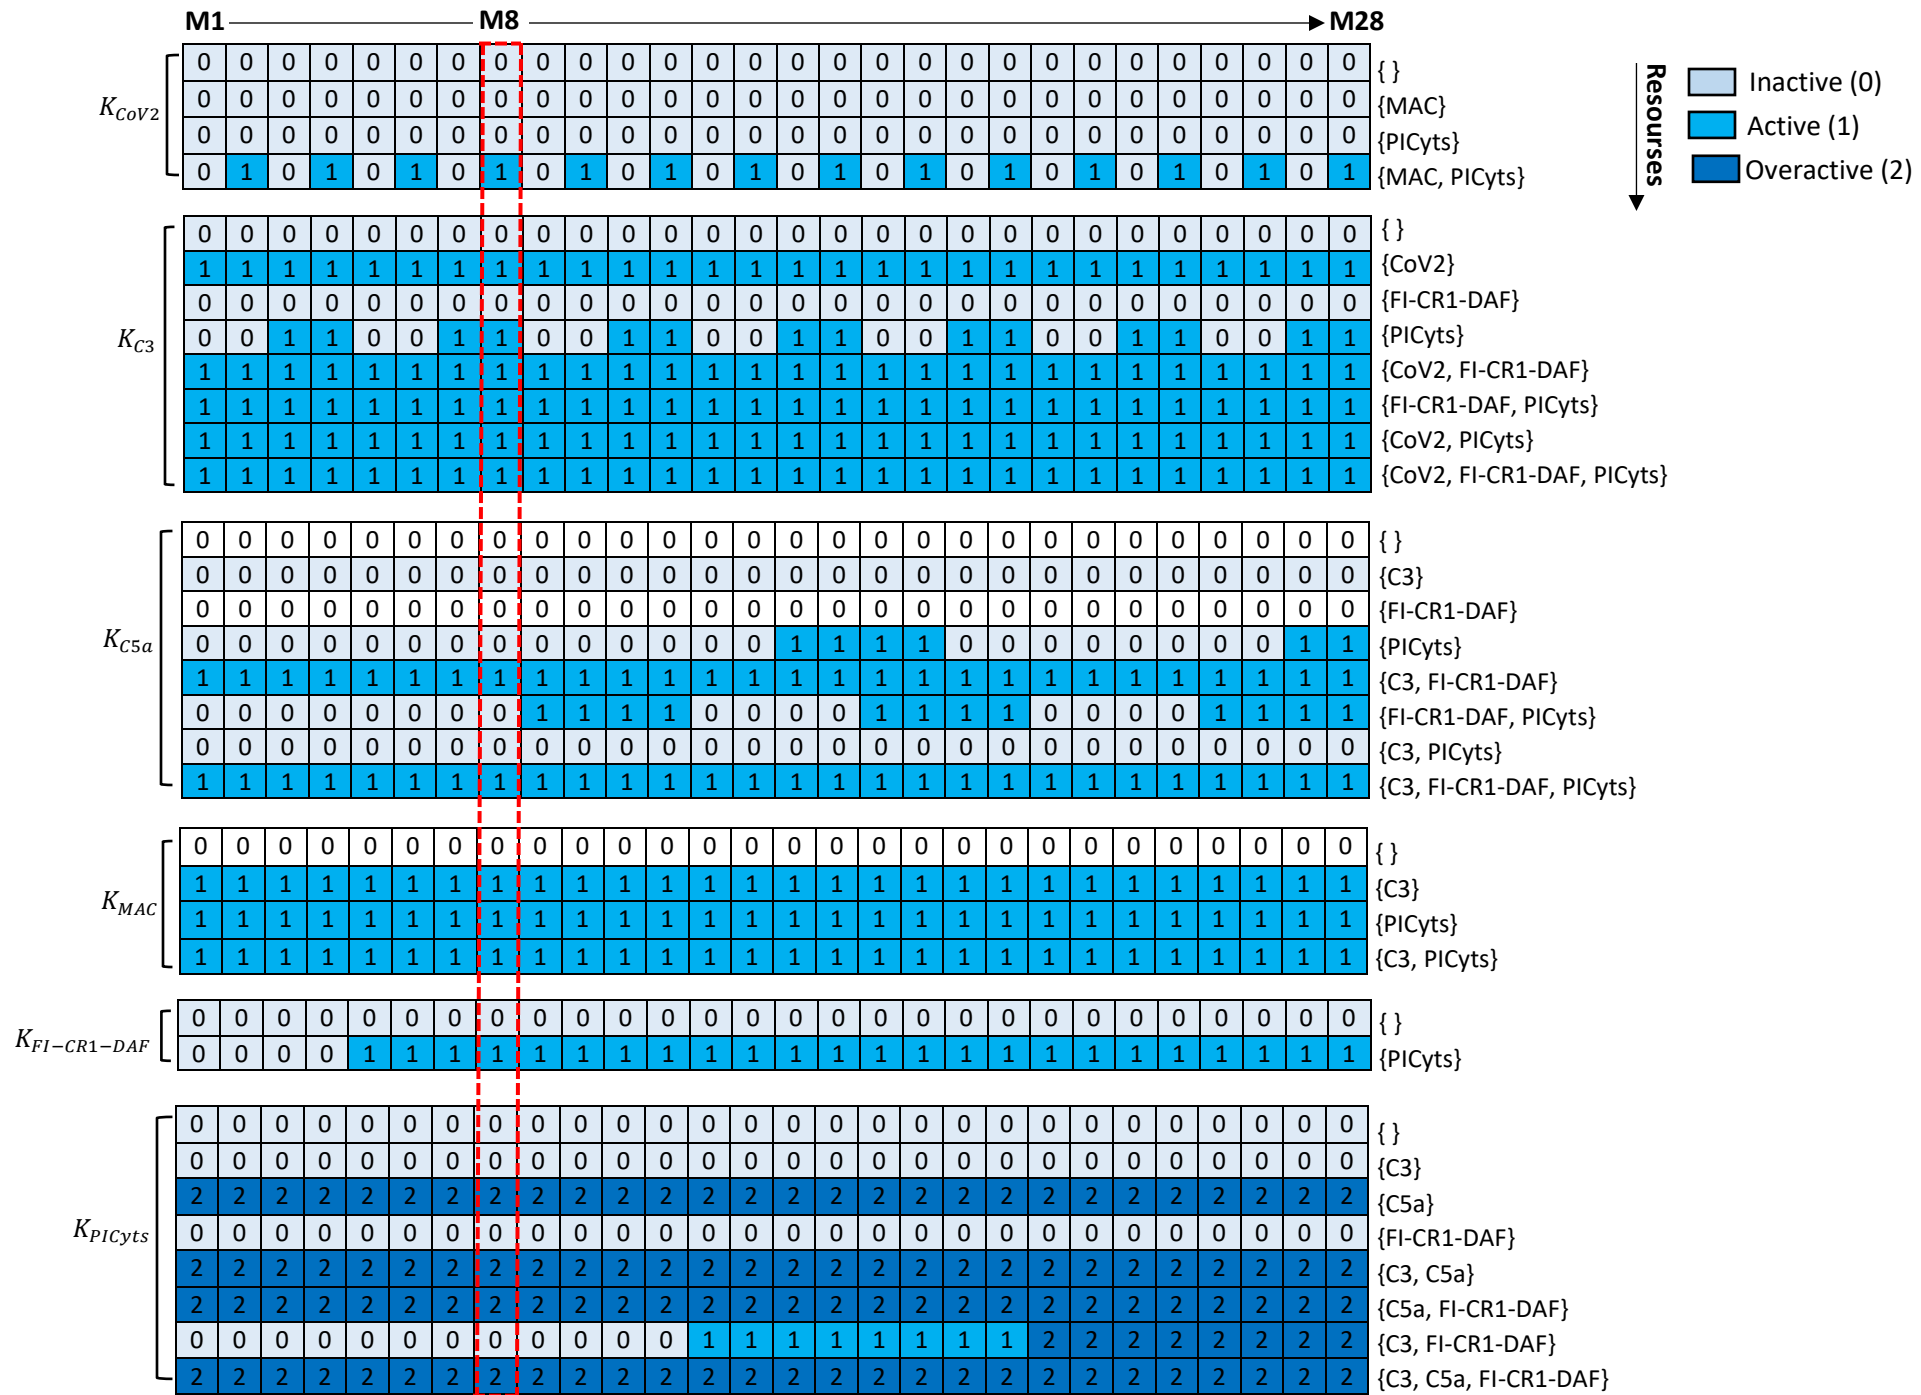

**Figure.** For case-1 (Intervention in C3 mediated upregulation of C5a and PICyts) heatmap representation of logical parameters sets.
