# Supplementary material for: Modelling and analysis of the complement system signalling pathways: roles of C3, C5a and pro-inflammatory cytokines in SARS-CoV-2 infection
Source: PeerJ journal article supplement (doi:10.7717/peerj.15794), 2023-09-20
Supplement: FileS1Def.pdf [file FileS1Def.pdf]

# Modelling and analysis of complement system signalling pathways: Roles of C3, C5a and pro-inflammatory cytokines in SARS-CoV-2 infection

Didar Murad<sup>1</sup>, Rehan Zafar Paracha<sup>1\*</sup>, Muhammad Tariq Saeed<sup>1</sup>, Jamil Ahmad<sup>2</sup>, Ammar Mushtaq<sup>1</sup>, and Maleeha Humayun<sup>1</sup>

<sup>1</sup>School of Interdisciplinary Engineering and Sciences/Department of Sciences/National University of Sciences and Technology, H-12, Islamabad, Pakistan

<sup>2</sup>Department of Computer Science and Information Technology/University of Malakand, Chakdara, Khyber Pakhtunkhwa, Pakistan

Corresponding author:

Rehan Zafar Paracha<sup>1\*</sup>

Email address: rehan@sines.nust.edu.pk

## Semantics of Asynchronous multi-valued Kinetic Logic Formalism (Paracha et al., 2014; Saeed et al., 2016)

### **Definition 1 (Biological Regulatory Network)**

A BRN is a labeled directed graph  $D = (V, E)$  where  $V = \{p_1, \dots, p_n\}$  is a set of  $n$  vertices or nodes representing biological entities (proteins or genes) and  $E = \{(p_i, p_j) \mid (p_i, p_j) \in V \times V\}$  is a set of edges representing interactions. An edge is labeled with an integer  $\alpha$  (representing thresholds of interactions) and  $\beta$  representing "+" or "-" signs (for activation or inhibition). In the toy example of Figure 1A,  $V = \{p_1, p_2, p_3\}$  and  $E = \{(p_1, p_2), (p_2, p_3), (p_3, p_1)\}$ .

We denote the successors of an entity  $p_i \in V$  by the set  $S^+(p_i)$  and its predecessors by the set  $S^-(p_i)$ . For example,  $S^+(p_1) = \{p_2\}$ ,  $S^-(p_1) = \{p_3\}$ . The number of target entities of  $p_i$  is  $l_{p_i} = |S^+(p_i)|$  which represents the out degree of  $p_i$ . The threshold levels of entity say  $p_1$  is set within the range "1" to "total number of outgoing edges". As  $p_1$  has only one outgoing edge towards  $p_2$ , the only threshold value is set as "1". Let  $F_{p_i} = \{0, 1, 2, \dots, k_{p_i}\}$  where,  $k_{p_i} \leq l_{p_i}$  is the set of abstract expression of each entry  $p_i$ .

### **Definition 2 (Activation and Inhibition)**

Suppose  $p_1, p_2$ , and  $p_3$  are three entities shown in Figure 1A, threshold level of any entity is denoted by  $\theta$ . If  $p_1$  increases rate of activation of  $p_2$ , then  $p_1$  is an activator (upregulator) of  $p_2$ . In this case, always concentration level of  $p_1$  increases or decreases, it will affect concentration level of  $p_2$  in similar manner. This relationship is shown by dummy tendency graphs as sigmoidal curves (Figure 1 D). When  $p_1$  is below  $\theta$ , it slightly changes the synthesis rate of  $p_2$ . When  $p_1$  reaches at  $\theta$  activation rate of  $p_2$  rapidly increases up to the limit of concentration level assumed shown in Figure 1 D.

If  $p_3$  decreases activation rate of  $p_1$ , then  $p_3$  is known as inhibitor (downregulator) of  $p_1$ . Downregulation mechanism also depends on  $\theta$  of  $p_3$ . When concentration level of  $p_3$  reaches at  $\theta$   $p_3$  will be efficient in lowering  $p_1$  production levels up to a level where  $p_1$  can be totally deactivated. The affect of inhibition is also of sigmoidal nature.

### **Definition 3 (Qualitative State)**

A qualitative state is an  $n$ -tuple vector  $\{q_{p_i} \text{ for } i=1 \text{ to } n\}$  such that  $q_{p_i} \in F_{p_i}$  represent abstract concentration level of  $p_i$ . Basically, qualitative state indicates a configuration of all the components of a BRN. In a

(A) Dummy Biological Regulatory Network (BRN)

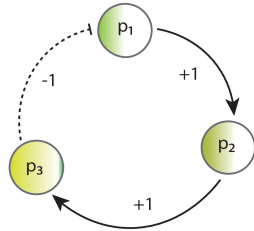

(B) Observations encoded to computation tree logic (CTL) formula

$((p_1 = 1 \ \& \ p_2 = 0 \ \& \ p_3 = 0) \rightarrow EF(p_1 = 0 \ \& \ p_2 = 1 \ \& \ p_3 = 1))$   
 $\& \ ((p_1 = 0 \ \& \ p_2 = 0 \ \& \ p_3 = 0) \rightarrow EF(AG(p_1 = 0 \ \& \ p_2 = 0 \ \& \ p_3 = 0)))$   
 $\& \ ((p_1 = 0 \ \& \ p_2 = 0 \ \& \ p_3 = 0) \rightarrow EX(EF(p_1 = 0 \ \& \ p_2 = 0 \ \& \ p_3 = 0)))$

(C) Logical parameters set (Model-1)

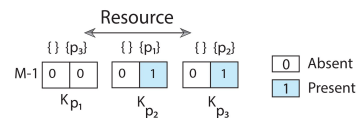

(E) State graph produced by using GINsim tool, employing parameters set M1

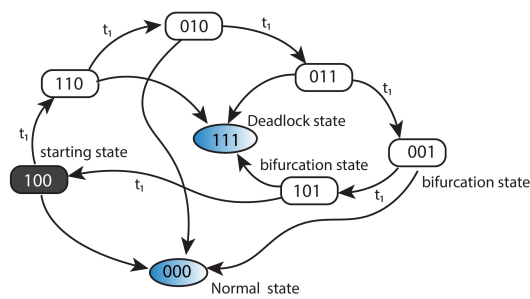

(D) Dummy tendency graphs

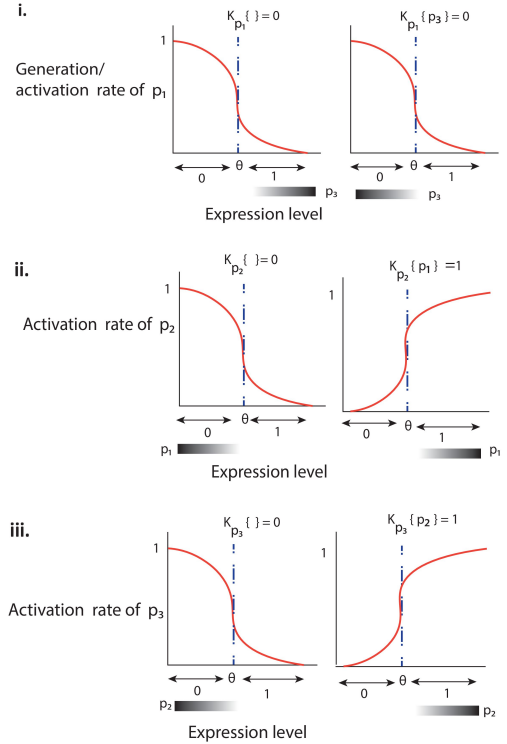

**Figure 1. The schematic of the qualitative modelling based on the Asynchronous Boolean logic approach.** (A) A toy BRN indicating a directed graph comprises of three entities  $p_1$ ,  $p_2$ , and  $p_3$ . The edges  $p_1$  to  $p_2$ ,  $p_2$  to  $p_3$ , and  $p_3$  to  $p_1$  indicating entities interaction. The edges are labeled with positive and negative signs representing activation and inhibition with threshold level 1 (see definition 1 and definition 2). (B) Let assumed observations that are encoded to CTL formula. (C) Using model checker NuSMV in SMBioNet tool (File S16), a parameters set (model-1) M-1 is generated. The CTL model checking infers logical parameters for the BRN which capture asynchronous evolution of entities and verify the CTL formula. (D) Dummy tendency graphs show generation level of targeted entity due to presence or absence of resource entity as activator or inhibitor. (E) Using definition 5, BRN is simulated to state graph shows that all the expression levels (states) of entities evolve in asynchronous fashion i.e. in the state only one entity changes its states. The state graph comprises of trajectory ( $t_1$ ) indicates SCC (definition 6) attractors as bistability deadlock state (1, 1, 1) and normal state (0, 0, 0). Bifurcation states (0, 0, 1) and (1, 0, 1) from where the state transitions can evolve either in the direction of deadlock state or recovery state.

given state, each node  $p_i$  as a target is regulated by its predecessors  $S^-(p_i)$  formally specified by set of resources defined below.

**Definition 4 (Set of Resources)**

At a given level of expression  $q_{p_y}$  for entry  $p_y \in V$  the set of resources is defined as:  $M_{(p_y)} = \{p_x \in S^-(p_y) \mid (q_{p_x} \geq \alpha_{p_x,p_y} \ \& \ \beta_{p_x,p_y} = \text{"+"}) \text{ or } (q_{p_x} < \alpha_{p_x,p_y} \ \& \ \beta_{p_x,p_y} = \text{"-"})\}$ .

It is to be noted that presence of activators or absence of inhibitors is assumed as resource.  $M_{(p_i)}$  can include activators and inhibitors of  $p_i$ . The targets toward which the concentration levels of  $p_i$  evolve, depend on set of positive integers  $K_{p_i}(M_{(p_i)})$  known as logical parameters, indexed by  $M_{(p_i)}$ .

The logical parameter  $K_{p_i}(M_{(p_i)})$  at an expression level  $q_{p_i}$  of  $p_i$  provides information about evolution of entity  $p_i$ , such that

$$q_{p_i} \overset{\uparrow}{\rightarrow} K_{p_i}(M_{(p_i)}) = \begin{cases} q_{p_i} + 1 & \text{if } q_{p_i} < K_{p_i}(M_{(p_i)}) \\ q_{p_i} - 1 & \text{if } q_{p_i} > K_{p_i}(M_{(p_i)}) \\ q_{p_i} & \text{if } q_{p_i} = K_{p_i}(M_{(p_i)}) \end{cases} \quad (1)$$

where:  $q_{p_i} \ \& \ K_{p_i}(M_{(p_i)}) \in F_{p_i}$ .

It illustrates the evolution from one level to another, where " $\overset{\uparrow}{\rightarrow}$ " represents the evolution operator.

**Definition 5 (State Graph/Space)**

Consider the BRN  $D = (V, E)$ , for an entity say  $p_i$ ,  $q_{p_i}$  represents its concentration level in a state  $q \in Q$ . Then state graph of BRN is a directed graph represented by  $T = (Q, R)$ ,  $R \subseteq Q \times Q$  is a transition relation between states and  $q \rightarrow q' \in R \iff$

- $\exists$  unique  $u \in V$  such that (s.t)  $q_{p_u} \neq q'_{p_u}$  and  $q'_{p_u} = q_{p_u} \overset{\uparrow}{\rightarrow} K_{p_u}(M_{p_u})$ , and
- $\forall v \in V \setminus \{u\}$  s.t  $q'_{p_v} = q_{p_v}$ .

**Definition 6 (Strongly Connected Component)**

Strongly connected component (SCC) is a portion of state graph  $T = (Q, R)$  in which there is a trajectory from each state to another state. It define the regulatory cycle of signalling networks in which the system loop through specific trajectories. For example, let  $x$  and  $y$  are any qualitative states in  $T$ , directed paths from  $x$  to  $y$  and  $y$  to  $x$  constitute SCC. In State graph trajectories labelled with  $t_1$  as  $(1, 0, 0) \rightarrow (1, 1, 0) \rightarrow (0, 1, 0) \rightarrow (0, 1, 1) \rightarrow (0, 0, 1) \rightarrow (1, 0, 1) \rightarrow (1, 0, 0)$  represent SCC is shown in Figure 1E.

**Definition 7 (Betweenness Centrality)**

For the interaction graph  $D = (V, E)$  with state graph  $T = (Q, R)$ , let  $x, y$  and  $z$  are any qualitative states in  $T$ , such that  $x \neq y \neq z$ . Betweenness Centrality (BC) of state  $z$  is mathematically defined as:

$$C_b(z) = \sum_{(x,y) \in \Delta} \frac{\phi_{(x,y)}(z)}{\phi_{(x,y)}} \quad (2)$$

Where,  $\phi_{(x,y)}(z)$  is total number of trajectories from  $x$  to  $y$  pass through  $z$ ,  $\phi_{(x,y)}$  is total number of short trajectories from  $x$  to  $y$  and  $\Delta$  is the set of all order pairs  $(x,y)$ .

**REFERENCES**

Paracha, R. Z., Ahmad, J., Ali, A., Hussain, R., Niazi, U., Tareen, S. H. K., and Aslam, B. (2014). Formal modelling of toll like receptor 4 and jak/stat signalling pathways: insight into the roles of socs-1, interferon- $\beta$  and proinflammatory cytokines in sepsis. *PLoS one*, 9(9):e108466.

Saeed, M. T., Ahmad, J., Kanwal, S., Holowatyj, A. N., Sheikh, I. A., Paracha, R. Z., Shafi, A., Siddiq, A., Bibi, Z., Khan, M., et al. (2016). Formal modeling and analysis of the hexosamine biosynthetic pathway: role of o-linked n-acetylglucosamine transferase in oncogenesis and cancer progression. *PeerJ*, 4:e2348.
