# Supplementary material for: Modelling and analysis of the complement system signalling pathways: roles of C3, C5a and pro-inflammatory cytokines in SARS-CoV-2 infection
Source: PeerJ journal article supplement (doi:10.7717/peerj.15794), 2023-09-20
Supplement: FileS2.pdf [file FileS2.pdf]

# Modelling and analysis of complement system signalling pathways: Roles of C3, C5a and pro-inflammatory cytokines in SARS-CoV-2 infection

Didar Murad<sup>1</sup>, Rehan Zafar Paracha<sup>1\*</sup>, Muhammad Tariq Saeed<sup>1</sup>, Jamil Ahmad<sup>2</sup>, Ammar Mushtaq<sup>1</sup>, and Maleeha Humayun<sup>1</sup>

<sup>1</sup>School of Interdisciplinary Engineering and Sciences/Department of Sciences/National University of Sciences and Technology, H-12, Islamabad, Pakistan

<sup>2</sup>Department of Computer Science and Information Technology/University of Malakand, Chakdara, Khyber Pakhtunkhwa, Pakistan

Corresponding author:

Rehan Zafar Paracha<sup>1\*</sup>

Email address: rehan@sines.nust.edu.pk

**The Computational Tree Logic (CTL) formalism fundamentals (Paracha, 2015; Chabrier and Fages, 2003)**

The CTL formula is defined inductively with:

- A finite state of propositional variables:  $\{v_i\}$ .
- Logical connectives:  $\top$  (boolean true),  $\perp$  (boolean false),  $\neg$  (negation),  $\wedge$  (logical AND),  $\vee$  (logical OR),  $\Rightarrow$  (implication).
- Temporal connectives: AX, EX, AG, EG, AU, EU, AF, EF.
- Rules of formation:  $v_i, \top, \perp$  are formulae. If  $\phi_1$  and  $\phi_2$  are propositional logic formulae then  $(\neg\phi_1), (\phi_1 \wedge \phi_2), (\phi_1 \vee \phi_2), (\phi_1 \Rightarrow \phi_2), AX\phi_1, EX\phi_1, A[\phi_1 U \phi_2], E[\phi_1 U \phi_2], AG\phi_1, EG\phi_1, AF\phi_1, EF\phi_1$  are formulae.

The logical connectives are the classical ones: false, true, not, and, or implication. All the temporal connectives are pairs of symbols. The first element of the pair is A or E. The second one is temporal operator as X, F, G or U.

Meaning of the Connectives:

- A : along All paths
- E : along at least one path (there Exist)
- X : neXt state
- F ( also written as ' $\diamond$ ' ): some Future state
- G ( also written as ' $\square$ ' ) : all future states (Globally)
- U : Until

All the CTL connectives are equivalent to a combination of a set of six of them, for example  $\{\perp, \neg, \wedge, AF, EU, EX\}$ . So, all the formulas can be written with this set of connectives using the following equivalences.

**Equivalences between CTL Formulae**

1.  $\neg AF\phi \equiv EG\neg\phi$
2.  $\neg EF\phi \equiv AG\neg\phi$

3.  $\neg AX\phi \equiv EX\neg\phi$
4.  $AF\phi \equiv A[\top \cup \phi]$
5.  $EF\phi \equiv E[\top \cup \phi]$
6.  $A[p \cup q] \equiv \neg(E[\neg q U (\neg p \wedge \neg q)] \vee EG\neg q)$

**Establishment of CTL:**

- State formulae syntax as  $\phi := \text{true } v_i, \phi_1 \wedge \phi_2, \neg\phi_1, E\alpha, A\alpha$ , where:  $\phi_1, \phi_2$  are state formulae,  $\alpha$  : is path formula.
- Path formulae syntax as  $\alpha := \phi, X\alpha_1, \alpha_1 U \alpha_2, F\alpha_1, G\alpha_1$ , where:  $\phi$  is state formula,  $\alpha_1 \alpha_2$ : are path formulae.
- We can write path formulae as state formula for development of CTL as  $X\phi_1, \phi_1 U \phi_2, F\phi_1, G\phi_1$ .
- So, with the help of above governing rules we can write CTLs, some examples of legal and illegal CTLs are given as
  - Legal CTL formulae:  $EFv_1, EFAGv_1, AXv_2, AFv_1 \wedge AGv_2, A(v_1 U (FGv_2))$ .
  - Illegal CTL formulae:  $AFGv_1, Av_1, EGFv_i, A(Fv_1 \wedge Gv_2), A(v_1 U (Gv_2))$ .

## REFERENCES

- Chabrier, N. and Fages, F. (2003). Symbolic model checking of biochemical networks. In *International Conference on Computational Methods in Systems Biology*, pages 149–162. Springer.
- Paracha, R. Z. (2015). Modelling of tlr4 and jak/stat signalling pathways and protein-protein interaction studies to examine the pathophysiology of sepsis. phd thesis. *National University of Sciences and Technology (NUST) Islamabad, Pakistan*.
