# Supplementary material for: Modelling and analysis of the complement system signalling pathways: roles of C3, C5a and pro-inflammatory cytokines in SARS-CoV-2 infection
Source: PeerJ journal article supplement (doi:10.7717/peerj.15794), 2023-09-20
Supplement: FileS15.pdf [file FileS15.pdf]

**For normal condition BRN modelling: Entry of logical parameters set as tabulated in Table 2 in SMBioNet and GINsim tolls with description of the resources.**

| S.no | SMBioNet Kinetic parameters with description                                                              | GINsim kinetic parameters                    |
|------|-----------------------------------------------------------------------------------------------------------|----------------------------------------------|
| 1.   | $K_{CoV2}\{ \} = 0$ ; PICyts and MAC are active for CoV2.                                                 | $K_{CoV2}\{PICyts, MAC\} = 0$                |
| 2.   | $K_{CoV2}\{MAC\} = 0$ ; PICyts is active, MAC is inactive for CoV2.                                       | $K_{CoV2}\{PICyts\} = 0$                     |
| 3.   | $K_{CoV2}\{PICyts\} = 0$ ; PICyts is inactive, MAC is active for CoV2.                                    | $K_{CoV2}\{MAC\} = 0$                        |
| 4.   | $K_{CoV2}\{MAC, PICyts\} = 0$ ; MAC and PICyts are inactive for CoV2.                                     | $K_{CoV2}\{ \} = 0$                          |
| 5.   | $K_{C3}\{ \} = 0$ ; CoV2 and PICyts are inactive and FI-CR1-DAF is active for C3.                         | $K_{C3}\{FI - CR1 - DAF\} = 0$               |
| 6.   | $K_{C3}\{CoV2\} = 1$ ; CoV2 and FI-CR1-DAF are active, PICyts is inactive for C3.                         | $K_{C3}\{CoV2, FI - CR1 - DAF\} = 1$         |
| 7.   | $K_{C3}\{FI - CR1 - DAF\} = 0$ ; FI-CR1-DAF, CoV2 and PICyts are inactive.                                | $K_{C3}\{ \} = 0$                            |
| 8.   | $K_{C3}\{PICyts\} = 0$ ; PICyts, FI-CR1-DAF are active and CoV2 is inactive for C3.                       | $K_{C3}\{PICyts, FI - CR1 - DAF\} = 0$       |
| 9.   | $K_{C3}\{CoV2, FI - CR1 - DAF\} = 1$ ; CoV2 is active, FI-CR1-DAF and PICyts are inactive for C3          | $K_{C3}\{CoV2\} = 1$                         |
| 10.  | $K_{C3}\{FI - CR1 - DAF, PICyts\} = 1$ ; PICyts is active, FI-CR1-DAF and CoV2 are inactive for C3.       | $K_{C3}\{PICyts\} = 1$                       |
| 11.  | $K_{C3}\{CoV2, PICyts\} = 1$ ; CoV2, PICyts and FI-CR1-DAF are active for C3.                             | $K_{C3}\{CoV2, PICyts, FI - CR1 - DAF\} = 1$ |
| 12.  | $K_{C3}\{CoV2, PICyts, FI - CR1 - DAF\} = 1$ ; CoV2, PICyts are active and FI-CR1-DAF is inactive for C3. | $K_{C3}\{CoV2, PICyts\} = 1$                 |
| 13.  | $K_{C5a}\{ \} = 0$ ; C3 and PICyts are inactive and FI-CR1-DAF is active for C5a.                         | $K_{C5a}\{FI - CR1 - DAF\} = 0$              |
| 14.  | $K_{C5a}\{C3\} = 1$ ; C3, FI-CR1-DAF are active and PICyts is inactive for C5a.                           | $K_{C5a}\{C3, FI - CR1 - DAF\} = 1$          |
| 15.  | $K_{C5a}\{FI - CR1 - DAF\} = 0$ ; FI-CR1-DAF, C3 and PICyts are inactive for C5a.                         | $K_{C5a}\{ \} = 0$                           |
| 16.  | $K_{C5a}\{PICyts\} = 0$ ; PICyts, FI-CR1-DAF are active and C3 is inactive for C5a.                       | $K_{C5a}\{PICyts, FI - CR1 - DAF\} = 0$      |
| 17.  | $K_{C5a}\{C3, FI - CR1 - DAF\} = 1$ ; C3 is active, FI-CR1-DAF and PICyts are inactive for C5a.           | $K_{C5a}\{C3\} = 1$                          |
| 18.  | $K_{C5a}\{FI - CR1 - DAF, PICyts\} = 0$ ; FI-CR1-DAF, C3 are inactive, and PICyts active for C5a.         | $K_{C5a}\{PICyts\} = 0$                      |
| 19.  | $K_{C5a}\{C3, PICyts\} = 1$ ; C3 and PICyts and FI-CR1-DAF are active for C5a.                            | $K_{C5a}\{C3, PICyts, FI - CR1 - DAF\} = 1$  |
| 20.  | $K_{C5a}\{C3, PICyts, FI - CR1 - DAF\} = 1$ ; C3, PICyts are active and FI-CR1-DAF is inactive for C5a.   | $K_{C5a}\{C3, PICyts\} = 1$                  |

|     |                                                                                                         |                                             |
|-----|---------------------------------------------------------------------------------------------------------|---------------------------------------------|
| 21. | $K_{MAC}\{ \} = 0$ ; C3 and PICyts are inactive for MAC.                                                | $K_{MAC}\{ \} = 0$                          |
| 22. | $K_{MAC}\{C3\} = 1$ ; C3 is active and PICyts is inactive for MAC.                                      | $K_{MAC}\{C3\} = 1$                         |
| 23. | $K_{MAC}\{PICyts\} = 1$ ; PICyts is active and C3 is inactive for MAC.                                  | $K_{MAC}\{PICyts\} = 1$                     |
| 24. | $K_{MAC}\{C3, PICyts\} = 1$ ; C3 and PICyts are active for MAC.                                         | $K_{MAC}\{C3, PICyts\} = 1$                 |
| 25. | $K_{FI-CR1-DAF}\{ \} = 0$ ; PICyts is inactive for FI-CR1-DAF.                                          | $K_{FI-CR1-DAF}\{ \} = 0$                   |
| 26. | $K_{FI-CR1-DAF}\{PICyts\} = 1$ ; PICyts is active for FI-CR1-DAF.                                       | $K_{FI-CR1-DAF}\{PICyts\} = 1$              |
| 27. | $K_{PICyts}\{ \} = 0$ ; C3, C5a are inactive and FI-CR1-DAF is active for PICyts.                       | $K_{PICyts}\{FI - CR1 - DAF\} = 0$          |
| 28. | $K_{PICyts}\{C3\} = 0$ ; C3, FI-CR1-DAF are active and C5a is inactive for PICyts.                      | $K_{PICyts}\{C3, FI - CR1 - DAF\} = 0$      |
| 29. | $K_{PICyts}\{C5a\} = 2$ ; C5a, FI-CR1-DAF are active and C3 is inactive for PICyts.                     | $K_{PICyts}\{C5a, FI - CR1 - DAF\} = 2$     |
| 30. | $K_{PICyts}\{FI - CR1 - DAF\} = 0$ ; FI-CR1-DAF, C3, and C5a are inactive for PICyts.                   | $K_{PICyts}\{ \} = 0$                       |
| 31. | $K_{PICyts}\{C3, C5a\} = 2$ ; C3, C5a, and FI-CR1-DAF are active for PICyts.                            | $K_{PICyts}\{C3, C5a, FI - CR1 - DAF\} = 2$ |
| 32. | $K_{PICyts}\{C5a, FI - CR1 - DAF\} = 2$ ; C5a is active, FI-CR1-DAF and C3 are inactive for PICyts.     | $K_{PICyts}\{C5a\} = 2$                     |
| 33. | $K_{PICyts}\{C3, FI - CR1 - DAF\} = 1$ ; C3 is active, FI-CR1-DAF and C5a are inactive for PICyts.      | $K_{PICyts}\{C3\} = 1$                      |
| 34. | $K_{PICyts}\{C3, C5a, FI - CR1 - DAF\} = 2$ ; C3 and C5a are active, FI-CR1-DAF is inactive for PICyts. | $K_{PICyts}\{C3, C5a\} = 2$                 |
